# Supplementary material for: Combined Inhibition of Rad51 and Wee1 Enhances Cell Killing in HNSCC Through Induction of Apoptosis Associated With Excessive DNA Damage and Replication Stress
Source: Oxford University Press journal article supplement (doi:10.1158/1535-7163.mct-20-0252), 2021-05-04
Supplement: 15357163mct200252-sup-240345_3_supp_7031335_qr1sw1.xlsx [file 15357163mct200252-sup-240345_3_supp_7031335_qr1sw1.xlsx]

## Sheet: 2 way Anova 
Supplementary Table S1. Differentially expressed HNSCC DDR genes and their annotated functions shown in the heat map clusters.
Heat map gene order	Gene cluster	Gene	Gene function	Figure color	Maximum P-value HPV+OPSCC comparisons	Sig 4=<0.0001 3= <0.001 2=<0.01 1=<0.05	Average Fold change	Fold change HPV+OPSCC to HPV-neg OCSCC	Fold change HPV+OPSCC to HPV-neg OPSCC	Fold change HPV+OPSCC to HPV neg LHSCC
106	2	CCDC155	DNA damage checkpoint & response		0.0001	4	13.0445	14.814	13.7553	10.5641
182	3	EYA2	DNA damage checkpoint & response		0.0001	4	11.0348	16.8205	10.4773	5.80675
126	2	TEX15	DNA damage checkpoint & response		0.0001	4	8.62159	11.5161	10.5122	3.8365
128	2	C14orf39	DNA damage checkpoint & response		0.0001	4	5.88116	6.30077	5.50458	5.83814
178	3	BCL2	DNA damage checkpoint & response		0.0001	4	5.44489	5.92108	6.42865	3.98494
154	3	PYHIN1	DNA damage checkpoint & response		0.0001	4	3.27236	3.12874	3.39173	3.29663
107	2	RAD9B	DNA damage checkpoint & response		0.0001	4	3.15163	3.25119	3.22063	2.98308
186	3	MACROD2	DNA damage checkpoint & response		0.0001	4	3.07933	2.81279	4.01002	2.41517
66	2	E2F1	DNA damage checkpoint & response		0.0001	4	2.95021	3.23861	2.63337	2.97864
210	3	TP53	DNA damage checkpoint & response		0.0001	4	2.89108	3.07921	2.79765	2.79639
131	2	STK33	DNA damage checkpoint & response		0.0039	2	2.8819	4.38212	2.70785	1.55574
34	1	WDR76	DNA damage checkpoint & response		0.0001	4	2.83585	3.17821	2.33261	2.99674
118	2	REC8	DNA damage checkpoint & response		0.0001	4	2.75565	2.81302	2.8458	2.60812
137	2	LIG1	DNA damage checkpoint & response		0.0001	4	2.70973	2.89478	2.64523	2.58918
31	1	CDC7	DNA damage checkpoint & response		0.0001	4	2.66144	2.95541	2.32417	2.70474
110	2	DMC1	DNA damage checkpoint & response		0.0101	1	2.6528	3.82605	1.78839	2.34397
171	3	WNT1	DNA damage checkpoint & response		0.0001	4	2.63412	2.8559	2.73363	2.31285
208	3	SPATA18	DNA damage checkpoint & response		0.0001	4	2.61819	2.65571	3.08458	2.11427
113	2	SPIRE2	DNA damage checkpoint & response		0.0004	3	2.56659	3.15442	2.87082	1.67454
108	2	RPA2	DNA damage checkpoint & response		0.0001	4	2.52582	2.63533	2.38211	2.56001
95	2	CHAF1B	DNA damage checkpoint & response		0.0001	4	2.51304	2.90331	2.27613	2.35969
27	1	E2F8	DNA damage checkpoint & response		0.0001	4	2.49385	2.60424	2.33407	2.54324
84	2	HMGB2	DNA damage checkpoint & response		0.0012	2	2.47951	2.83552	1.99865	2.60436
103	2	FANCL	DNA damage checkpoint & response		0.0001	4	2.4608	2.79733	2.41927	2.16581
144	2	TP73	DNA damage checkpoint & response		0.0001	4	2.45672	2.41327	2.5206	2.43631
40	1	ESCO2	DNA damage checkpoint & response		0.0001	4	2.40752	2.77746	2.27493	2.17017
83	2	CDC25C	DNA damage checkpoint & response		0.0016	2	2.40681	2.69136	1.97284	2.55622
121	2	ANKLE1	DNA damage checkpoint & response		0.0001	4	2.39037	2.97397	2.45299	1.74416
150	3	CD74	DNA damage checkpoint & response		0.0001	4	2.32634	2.12048	2.41664	2.4419
3	1	BARD1	DNA damage checkpoint & response		0.0001	4	2.32546	2.53673	2.45601	1.98365
195	3	PMS2L11	DNA damage checkpoint & response		0.0001	4	2.32505	2.7601	2.36786	1.8472
22	1	E2F7	DNA damage checkpoint & response		0.0001	4	2.32197	2.69577	2.20468	2.06547
184	3	MAP2K6	DNA damage checkpoint & response		0.0002	3	2.29651	2.77141	2.397	1.72111
115	2	CDK3	DNA damage checkpoint & response		0.0001	4	2.29516	2.8991	2.24179	1.7446
152	3	WAS	DNA damage checkpoint & response		0.0001	4	2.26511	2.16899	2.58833	2.03802
6	1	CBX5	DNA damage checkpoint & response		0.0001	4	2.25517	2.5489	2.23354	1.98306
45	1	FANCD2	DNA damage checkpoint & response		0.0002	3	2.24919	2.48186	2.17018	2.09553
91	2	CHAF1A	DNA damage checkpoint & response		0.0002	3	2.24399	2.49224	2.15241	2.08733
87	2	DTL	DNA damage checkpoint & response		0.0007	3	2.19582	2.53246	2.05647	1.99854
59	1	PMAIP1	DNA damage checkpoint & response		0.0026	2	2.11198	2.04358	1.92238	2.36999
8	1	POLA1	DNA damage checkpoint & response		0.0009	3	2.10122	2.26731	2.0215	2.01486
153	3	CTLA4	DNA damage checkpoint & response		0.001	2	2.10054	2.08694	2.01921	2.19547
92	2	UHRF1	DNA damage checkpoint & response		0.0011	2	2.09904	2.22265	2.00431	2.07017
7	1	FIGNL1	DNA damage checkpoint & response		0.001	2	2.09003	2.28848	2.01672	1.9649
51	1	FANCC	DNA damage checkpoint & response		0.0002	3	2.07391	2.19002	2.14971	1.88201
47	1	RAD51AP1	DNA damage checkpoint & response		0.0043	2	2.07167	2.40751	1.87506	1.93244
5	1	CLSPN	DNA damage checkpoint & response		0.0007	3	2.04855	2.09484	2.04856	2.00225
148	3	BATF	DNA damage checkpoint & response		0.0003	3	2.04491	2.18492	2.14356	1.80625
191	3	USP51	DNA damage checkpoint & response		0.0021	2	2.0426	2.41532	1.94612	1.76635
197	3	IKBKE	DNA damage checkpoint & response		0.0003	3	2.04034	2.07377	2.14479	1.90244
151	3	TNFRSF1B	DNA damage checkpoint & response		0.0001	4	2.0324	1.94947	2.24583	1.9019
76	2	CDT1	DNA damage checkpoint & response		0.0069	2	2.01857	2.22044	1.8261	2.00919
198	3	POLH	DNA damage checkpoint & response		0.0016	2	1.98644	2.01626	1.97399	1.96908
75	2	SUV39H1	DNA damage checkpoint & response		0.0086	2	1.98446	2.12717	1.8048	2.02142
93	2	POLE	DNA damage checkpoint & response		0.0017	2	1.97025	2.09393	1.96706	1.84977
72	2	C17orf53	DNA damage checkpoint & response		0.0012	2	1.96808	2.21451	1.9979	1.69184
18	1	ATAD5	DNA damage checkpoint & response		0.0024	2	1.96393	2.25773	1.92993	1.70413
139	2	XRCC1	DNA damage checkpoint & response		0.0042	2	1.95274	2.02571	1.87588	1.95664
52	1	RMI1	DNA damage checkpoint & response		0.0051	2	1.94716	2.09454	1.85773	1.8892
79	2	FANCA	DNA damage checkpoint & response		0.0033	2	1.94529	2.05565	1.90113	1.8791
203	3	WDR48	DNA damage checkpoint & response		0.0014	2	1.94285	1.92988	1.98759	1.9111
46	1	RAD18	DNA damage checkpoint & response		0.0073	2	1.94009	2.02154	1.82052	1.97822
138	2	POLD1	DNA damage checkpoint & response		0.0058	2	1.92902	1.97484	1.84408	1.96813
78	2	RNASEH2A	DNA damage checkpoint & response		0.033	1	1.92558	2.12132	1.66248	1.99293
21	1	BRCA1	DNA damage checkpoint & response		0.0023	2	1.92491	2.09805	1.93732	1.73937
35	1	FBXO5	DNA damage checkpoint & response		0.0316	1	1.92172	2.10846	1.66725	1.98947
102	2	ING4	DNA damage checkpoint & response		0.0051	2	1.90951	2.0385	1.85687	1.83316
32	1	USP1	DNA damage checkpoint & response		0.0254	1	1.908	2.0163	1.69085	2.01684
68	2	RAD54L	DNA damage checkpoint & response		0.0167	1	1.90562	2.18166	1.73578	1.79943
135	2	MGMT	DNA damage checkpoint & response		0.0055	2	1.90402	1.91252	1.84973	1.9498
28	1	TOPBP1	DNA damage checkpoint & response		0.0091	2	1.90115	2.17962	1.79878	1.72505
190	3	NFATC2	DNA damage checkpoint & response		0.0057	2	1.88689	1.71445	2.41229	1.53393
201	3	PPM1D	DNA damage checkpoint & response		0.0024	2	1.85616	1.94744	1.93184	1.68921
82	2	POLE2	DNA damage checkpoint & response		0.0984	0	1.84913	1.9978	1.53637	2.01321
162	3	SLFN11	DNA damage checkpoint & response		0.0662	0	1.84658	2.13884	1.58362	1.81728
142	2	PTTG1	DNA damage checkpoint & response		0.0578	0	1.83387	1.87021	1.59939	2.032
85	2	CDK1	DNA damage checkpoint & response		0.0723	0	1.81439	2.04279	1.57327	1.82712
104	2	RAD51C	DNA damage checkpoint & response		0.0077	2	1.81141	1.99567	1.81555	1.623
200	3	MDM2	DNA damage checkpoint & response		0.0124	1	1.79454	1.91892	1.76664	1.69808
193	3	CASP2	DNA damage checkpoint & response		0.0121	1	1.78208	1.91831	1.7691	1.65884
101	2	OGG1	DNA damage checkpoint & response		0.0362	1	1.77445	1.90013	1.65217	1.77105
89	2	UBE2T	DNA damage checkpoint & response		0.0937	0	1.7676	2.12575	1.54233	1.63472
211	3	CIDEB	DNA damage checkpoint & response		0.0428	1	1.75774	1.76751	1.63354	1.87217
37	1	POLD3	DNA damage checkpoint & response		0.0242	1	1.75721	1.74707	1.69599	1.82856
61	1	RNF138	DNA damage checkpoint & response		0.0741	0	1.7381	1.95579	1.57039	1.68812
177	3	BCL2L11	DNA damage checkpoint & response		0.0281	1	1.73402	1.87919	1.68001	1.64286
196	3	DCLRE1C	DNA damage checkpoint & response		0.0298	1	1.73177	1.82238	1.67365	1.69929
25	1	CDK2	DNA damage checkpoint & response		0.0644	0	1.73107	1.88098	1.58694	1.7253
88	2	EXO1	DNA damage checkpoint & response		0.0399	1	1.72825	1.94575	1.64148	1.59753
50	1	UNG	DNA damage checkpoint & response		0.0246	1	1.70323	1.85501	1.69452	1.56015
73	2	FANCI	DNA damage checkpoint & response		0.0267	1	1.70231	1.84956	1.68575	1.57162
123	2	ASTE1	DNA damage checkpoint & response		0.1108	0	1.69539	1.99071	1.52162	1.57385
213	3	FOXO4	DNA damage checkpoint & response		0.0083	2	1.67805	1.59026	1.80786	1.63602
187	3	PRMT6	DNA damage checkpoint & response		0.1288	0	1.65788	1.91112	1.50273	1.55979
119	2	SPDYA	DNA damage checkpoint & response		0.0827	0	1.65092	1.71588	1.55728	1.67959
180	3	CDKN1B	DNA damage checkpoint & response		0.0936	0	1.63919	1.84475	1.54237	1.53046
16	1	MSH2	DNA damage checkpoint & response		0.1263	0	1.62196	1.8034	1.50521	1.55729
136	2	NEK11	DNA damage checkpoint & response		0.0622	0	1.61384	1.68767	1.59101	1.56282
11	1	DYRK1A	DNA damage checkpoint & response		0.0777	0	1.59873	1.67129	1.56474	1.56016
54	1	MCM10	DNA damage checkpoint & response		0.127	0	1.58093	1.70856	1.50451	1.52971
205	3	ZBTB5	DNA damage checkpoint & response		0.05	0	1.55814	1.50763	1.61606	1.55073
236	4	TNKS1BP1	DNA damage checkpoint & response		0.0783	0	-1.63564	-1.83075	-1.56393	-1.51225
220	4	SPIRE1	DNA damage checkpoint & response		0.0217	1	-1.7055	-1.64907	-1.70794	-1.75948
228	4	TMEM189-UBE2V1	DNA damage checkpoint & response		0.0048	2	-1.83406	-1.74238	-1.86288	-1.89693
252	4	MYC	DNA damage checkpoint & response		0.0031	2	-1.85431	-1.92726	-1.90817	-1.72748
258	4	EYA4	DNA damage checkpoint & response		0.0013	2	-1.8714	-1.54831	-2.01642	-2.04947
227	4	YAP1	DNA damage checkpoint & response		0.0028	2	-1.89884	-2.11752	-1.91612	-1.66288
267	4	SNAI1	DNA damage checkpoint & response		0.0078	2	-1.92742	-1.97897	-1.81496	-1.98833
240	4	BOK	DNA damage checkpoint & response		0.007	2	-1.9529	-2.33616	-1.82526	-1.69728
221	4	EGFR	DNA damage checkpoint & response		0.0374	1	-1.98974	-2.04721	-1.64858	-2.27343
273	4	MC1R	DNA damage checkpoint & response		0.0004	3	-2.04306	-1.96351	-2.10691	-2.05877
241	4	SFN	DNA damage checkpoint & response		0.0031	2	-2.07162	-2.71272	-1.93258	-1.56957
271	4	MAPK12	DNA damage checkpoint & response		0.0001	4	-2.10412	-1.76972	-2.32964	-2.213
247	4	TREX2	DNA damage checkpoint & response		0.0118	1	-2.1226	-2.80885	-1.77211	-1.78684
224	4	PLA2R1	DNA damage checkpoint & response		0.0001	4	-2.17376	-1.80546	-2.20587	-2.50995
243	4	PLK2	DNA damage checkpoint & response		0.0086	2	-2.25868	-3.0325	-2.23339	-1.51016
230	4	CD44	DNA damage checkpoint & response		0.0004	3	-2.36274	-2.66833	-2.10701	-2.31286
249	4	IER3	DNA damage checkpoint & response		0.0001	4	-2.56187	-2.42418	-2.87149	-2.38994
233	4	SNAI2	DNA damage checkpoint & response		0.0001	4	-2.74785	-3.05216	-2.84072	-2.35066
257	4	RBM24	DNA damage checkpoint & response		0.0001	4	-3.05138	-3.9728	-3.2472	-1.93413
260	4	SFRP2	DNA damage checkpoint & response		0.0001	4	-3.76886	-3.81249	-3.3287	-4.1654
226	4	ZNF365	DNA damage checkpoint & response		0.0001	4	-3.82606	-3.96038	-3.91858	-3.59922
219	4	CCND1	DNA damage checkpoint & response		0.0001	4	-3.88697	-3.20852	-4.60376	-3.84865
256	4	ANKRD1	DNA damage checkpoint & response		0.0001	4	-4.93306	-7.62965	-5.43613	-1.7334
235	4	HMGA2	DNA damage checkpoint & response		0.0001	4	-8.16612	-9.10104	-6.97103	-8.4263
97	2	MCM2	DNA duplex unwinding		0.0001	4	2.87048	3.42324	2.60367	2.58453
2	1	BRIP1	DNA duplex unwinding		0.0001	4	2.67626	2.90693	2.78043	2.34143
44	1	GINS4	DNA duplex unwinding		0.0001	4	2.51333	2.80863	2.51672	2.21464
99	2	MCM5	DNA duplex unwinding		0.0003	3	2.30623	2.60475	2.11692	2.19701
29	1	POLQ	DNA duplex unwinding		0.0004	3	2.22482	2.57479	2.10569	1.99399
96	2	MCM3	DNA duplex unwinding		0.002	2	2.1004	2.3108	1.9478	2.04261
98	2	MCM6	DNA duplex unwinding		0.0097	2	2.0915	2.4047	1.79214	2.07766
67	2	RFC4	DNA duplex unwinding		0.0471	1	2.03412	2.52786	1.62279	1.95171
41	1	RFC5	DNA duplex unwinding		0.0254	1	2.01382	2.3755	1.69092	1.97503
204	3	XPC	DNA duplex unwinding		0.0005	3	1.98641	1.95272	2.08901	1.91749
19	1	TOP2A	DNA duplex unwinding		0.0138	1	1.87653	2.1754	1.75537	1.69883
146	2	TREX1	DNA duplex unwinding		0.0021	2	1.86658	1.803	1.94464	1.8521
77	2	GINS2	DNA duplex unwinding		0.0527	0	1.86605	2.1344	1.61	1.85375
71	2	PIF1	DNA duplex unwinding		0.0231	1	1.85718	2.02344	1.70118	1.84691
26	1	MCM8	DNA duplex unwinding		0.0052	2	1.8416	1.9518	1.85452	1.71849
145	2	DDB2	DNA duplex unwinding		0.0148	1	1.79387	1.77489	1.74817	1.85855
38	1	RFC3	DNA duplex unwinding		0.0719	0	1.72205	1.7874	1.57391	1.80483
48	1	RAD54B	DNA duplex unwinding		0.0452	1	1.70798	1.92303	1.62742	1.57349
74	2	MCM7	DNA duplex unwinding		0.1036	0	1.69007	2.01211	1.52998	1.52811
55	1	ERCC6L	DNA duplex unwinding		0.0757	0	1.67997	1.82927	1.56787	1.64278
70	2	CHTF18	DNA duplex unwinding		0.0847	0	1.64787	1.83507	1.55449	1.55403
49	1	MCM4	DNA duplex unwinding		0.0875	0	1.6104	1.65999	1.5506	1.62062
129	2	RNF212	DNA repair		0.0001	4	11.965	16.0825	9.99158	9.82089
158	3	CD40LG	DNA repair		0.0001	4	4.41385	4.73095	4.52827	3.98232
116	2	CNTD1	DNA repair		0.0001	4	3.6965	3.91051	3.67527	3.50372
155	3	TBX21	DNA repair		0.0001	4	3.07336	2.9382	3.1641	3.11778
159	3	CD28	DNA repair		0.0001	4	2.79509	2.8704	3.07303	2.44184
160	3	PTPRC	DNA repair		0.0001	4	2.7243	2.74671	2.89756	2.52862
157	3	CCR6	DNA repair		0.0001	4	2.6209	2.49371	2.73005	2.63893
174	3	AICDA	DNA repair		0.0001	4	2.59022	3.09408	2.33005	2.34652
161	3	FOXP3	DNA repair		0.0001	4	2.46711	2.43543	2.63933	2.32656
165	3	IL27RA	DNA repair		0.0002	3	2.09253	2.38761	2.15186	1.73812
10	1	THAP10	DNA repair		0.0064	2	1.9877	2.30781	1.83515	1.82013
65	2	PSMC3IP	DNA repair		0.02	1	1.95214	2.23464	1.71641	1.90537
167	3	TCF7	DNA repair		0.016	1	1.91637	2.00858	1.74018	2.00033
163	3	CD40	DNA repair		0.0363	1	1.65694	1.72224	1.6519	1.59668
175	3	IL2	DNA repair		0.0814	0	1.65436	1.66978	1.55925	1.73405
275	4	PGBD5	DNA repair		0.0836	0	-1.74093	-2.06482	-1.55599	-1.60198
239	4	TGFB1	DNA repair		0.0014	2	-1.87291	-1.96808	-2.03805	-1.61261
250	4	CLCF1	DNA repair		0.0001	4	-2.90686	-2.9794	-3.0244	-2.71677
229	4	RAG1	DNA repair		0.0001	4	-3.04719	-2.57131	-2.852	-3.71825
111	2	NT5M	DNA replication		0.0001	4	3.23573	4.38658	2.66653	2.65407
33	1	CCNE2	DNA replication		0.0001	4	2.92771	2.97754	2.73467	3.07093
114	2	NPM2	DNA replication		0.0001	4	2.73728	3.9148	2.38672	1.91032
43	1	PRIM1	DNA replication		0.0003	3	2.36204	2.52893	2.13551	2.42166
81	2	GINS1	DNA replication		0.001	2	1.9695	1.96904	2.01522	1.92424
132	2	TSPYL2	DNA replication		0.0044	2	1.91765	2.27429	1.92935	1.54931
9	1	USP37	DNA replication		0.0089	2	1.83193	2.01001	1.80146	1.68433
12	1	RBBP4	DNA replication		0.0414	1	1.79268	1.95087	1.63722	1.78995
69	2	NASP	DNA replication		0.0805	0	1.72832	1.85514	1.56054	1.76927
105	2	RBBP7	DNA replication		0.0497	1	1.65448	1.76827	1.61668	1.57848
125	2	THAP9	DNA replication		0.0479	1	1.62785	1.76217	1.62082	1.50057
212	3	NFIA	DNA replication		0.0318	1	1.61879	1.56266	1.66664	1.62707
225	4	RBMS1	DNA replication		0.0177	1	-1.6495	-1.65122	-1.7294	-1.56789
272	4	TOP1MT	DNA replication		0.0003	3	-2.26091	-2.17516	-2.13918	-2.4684
259	4	EGF	DNA replication		0.0001	4	-2.81128	-2.5759	-2.5464	-3.31153
279	4	GLI2	DNA replication		0.0001	4	-3.81078	-2.6516	-3.98324	-4.7975
278	4	GLI1	DNA replication		0.0001	4	-4.50971	-3.16321	-4.60421	-5.76172
244	4	EREG	DNA replication		0.0001	4	-13.5757	-23.9921	-8.3996	-8.33524
217	3	CDKN2A	Regulaiton Mitotic cell cycle		0.0001	4	26.3994	23.2551	35.0486	20.8944
185	3	FOXA1	Regulaiton Mitotic cell cycle		0.0001	4	12.295	19.173	13.4692	4.24271
156	3	UBD	Regulaiton Mitotic cell cycle		0.0001	4	9.149	9.95359	9.2984	8.19499
109	2	CDKN2C	Regulaiton Mitotic cell cycle		0.0001	4	6.63355	8.09987	5.1052	6.69559
183	3	PBX1	Regulaiton Mitotic cell cycle		0.0001	4	4.5933	6.2524	4.59306	2.93443
134	2	FOXG1	Regulaiton Mitotic cell cycle		0.0036	2	4.48182	6.55954	5.32496	1.56095
216	3	PKIA	Regulaiton Mitotic cell cycle		0.0001	4	3.86207	3.7326	4.16222	3.69139
149	3	MAP4K1	Regulaiton Mitotic cell cycle		0.0001	4	3.69747	3.98782	4.03911	3.06547
181	3	STOX1	Regulaiton Mitotic cell cycle		0.0001	4	3.58278	5.06886	3.78033	1.89914
169	3	KIF25	Regulaiton Mitotic cell cycle		0.0001	4	3.48381	3.863	2.76516	3.82328
112	2	FBXO43	Regulaiton Mitotic cell cycle		0.0001	4	3.29568	4.27578	2.50863	3.10263
218	3	CDKN2B	Regulaiton Mitotic cell cycle		0.0001	4	2.82927	1.99941	3.4985	2.9899
209	3	ID2	Regulaiton Mitotic cell cycle		0.0001	4	2.55917	2.56401	2.50079	2.61271
124	2	CEP70	Regulaiton Mitotic cell cycle		0.0001	4	2.53122	3.24685	2.32916	2.01767
199	3	CUL9	Regulaiton Mitotic cell cycle		0.0001	4	2.4678	2.61331	2.63239	2.15769
42	1	NUSAP1	Regulaiton Mitotic cell cycle		0.0007	3	2.43793	2.83291	2.05165	2.42924
179	3	PRKAR2B	Regulaiton Mitotic cell cycle		0.0001	4	2.43244	2.73759	2.59027	1.96946
166	3	MAP3K14	Regulaiton Mitotic cell cycle		0.0001	4	2.42962	2.57434	2.27028	2.44425
172	3	PIM2	Regulaiton Mitotic cell cycle		0.0004	3	2.38489	2.92014	2.55601	1.67853
192	3	TNIK	Regulaiton Mitotic cell cycle		0.0001	4	2.37985	2.7942	2.29969	2.04566
170	3	PAK3	Regulaiton Mitotic cell cycle		0.0001	4	2.27994	2.48436	2.28728	2.06819
194	3	EZH2	Regulaiton Mitotic cell cycle		0.0006	3	2.27752	2.60252	2.0668	2.16324
188	3	CCNB3	Regulaiton Mitotic cell cycle		0.0001	4	2.27086	2.05816	2.85843	1.89599
39	1	CENPJ	Regulaiton Mitotic cell cycle		0.0002	3	2.26458	2.3991	2.1665	2.22814
24	1	KNTC1	Regulaiton Mitotic cell cycle		0.0006	3	2.2379	2.60384	2.06902	2.04084
189	3	USP44	Regulaiton Mitotic cell cycle		0.0026	2	2.21781	2.68942	2.38408	1.57992
120	2	TERT	Regulaiton Mitotic cell cycle		0.0001	4	2.12519	1.94272	2.4155	2.01735
127	2	DMRT1	Regulaiton Mitotic cell cycle		0.0008	3	2.10802	2.55457	2.03446	1.73504
86	2	ZWINT	Regulaiton Mitotic cell cycle		0.003	2	2.03795	2.18493	1.91072	2.01821
140	2	HAUS5	Regulaiton Mitotic cell cycle		0.002	2	2.01051	2.09572	1.95153	1.98426
168	3	GFI1B	Regulaiton Mitotic cell cycle		0.0023	2	2.00844	2.23531	1.93521	1.8548
15	1	CEP152	Regulaiton Mitotic cell cycle		0.0038	2	1.99122	2.21405	1.88564	1.87397
130	2	CDKN1C	Regulaiton Mitotic cell cycle		0.0162	1	1.98928	1.98975	1.73917	2.23893
122	2	NINL	Regulaiton Mitotic cell cycle		0.0016	2	1.98144	2.35473	1.96996	1.61962
62	1	HAUS1	Regulaiton Mitotic cell cycle		0.0221	1	1.91353	2.03879	1.70615	1.99564
117	2	SFI1	Regulaiton Mitotic cell cycle		0.003	2	1.90182	2.1401	1.90834	1.65701
215	3	KCNA5	Regulaiton Mitotic cell cycle		0.0015	2	1.8857	1.91148	1.97667	1.76895
207	3	PCM1	Regulaiton Mitotic cell cycle		0.0015	2	1.88423	1.90137	1.9782	1.77311
36	1	PLK4	Regulaiton Mitotic cell cycle		0.0092	2	1.8584	1.88737	1.79796	1.88987
56	1	CDC25A	Regulaiton Mitotic cell cycle		0.0053	2	1.85806	1.93517	1.85305	1.78596
94	2	ESPL1	Regulaiton Mitotic cell cycle		0.0255	1	1.84654	2.18591	1.69036	1.66335
90	2	NEK2	Regulaiton Mitotic cell cycle		0.0338	1	1.84578	2.18927	1.65985	1.68822
20	1	CENPF	Regulaiton Mitotic cell cycle		0.0188	1	1.80831	2.12221	1.72319	1.57955
53	1	CEP78	Regulaiton Mitotic cell cycle		0.0026	2	1.80604	1.84945	1.92571	1.64295
13	1	CEP135	Regulaiton Mitotic cell cycle		0.0286	1	1.78675	1.88944	1.67827	1.79255
143	2	PTTG2	Regulaiton Mitotic cell cycle		0.0394	1	1.73407	1.77807	1.64288	1.78126
60	1	WEE1	Regulaiton Mitotic cell cycle		0.0807	0	1.73206	1.86083	1.56035	1.775
147	2	FBXW5	Regulaiton Mitotic cell cycle		0.0046	2	1.72774	1.68176	1.86728	1.63417
4	1	RBL1	Regulaiton Mitotic cell cycle		0.0537	0	1.68564	1.74011	1.60782	1.709
176	3	PSMA8	Regulaiton Mitotic cell cycle		0.0134	1	1.68248	1.75471	1.75882	1.5339
57	1	KIF11	Regulaiton Mitotic cell cycle		0.0801	0	1.6724	1.81435	1.56119	1.64165
173	3	PTPN6	Regulaiton Mitotic cell cycle		0.0323	1	1.66267	1.77117	1.66483	1.55202
206	3	MCPH1	Regulaiton Mitotic cell cycle		0.0193	1	1.64878	1.6566	1.7204	1.56933
214	3	PCNT	Regulaiton Mitotic cell cycle		0.021	1	1.64059	1.56747	1.71127	1.64303
202	3	APPL1	Regulaiton Mitotic cell cycle		0.0327	1	1.62771	1.65343	1.6634	1.56631
164	3	BTN2A2	Regulaiton Mitotic cell cycle		0.0586	0	1.59673	1.66949	1.59792	1.52279
58	1	MKI67	Regulaiton Mitotic cell cycle		0.0797	0	1.5667	1.61925	1.56171	1.51915
141	2	NUP62	Regulaiton Mitotic cell cycle		0.0855	0	1.53133	1.53341	1.55337	1.5072
133	2	RPRM	Regulaiton Mitotic cell cycle		0.0874	0	-0.491805	1.62658	-1.55074	-1.55126
222	4	DYNC1H1	Regulaiton Mitotic cell cycle		0.1229	0	-1.52087	-1.52643	-1.50864	-1.52755
223	4	YWHAG	Regulaiton Mitotic cell cycle		0.0472	1	-1.61911	-1.59695	-1.62266	-1.63774
251	4	SPHK1	Regulaiton Mitotic cell cycle		0.0213	1	-1.62449	-1.64257	-1.70983	-1.52107
270	4	ADAMTS1	Regulaiton Mitotic cell cycle		0.0854	0	-1.69947	-1.63391	-1.55356	-1.91094
237	4	GNAI1	Regulaiton Mitotic cell cycle		0.0009	3	-1.86854	-1.93342	-2.02708	-1.64512
263	4	TIMP2	Regulaiton Mitotic cell cycle		0.0032	2	-1.94266	-1.96284	-1.9043	-1.96083
262	4	PDGFRB	Regulaiton Mitotic cell cycle		0.0021	2	-1.94947	-1.89114	-1.94658	-2.01069
254	4	IL1B	Regulaiton Mitotic cell cycle		0.0005	3	-1.9827	-2.09632	-2.18287	-1.66892
269	4	PRKCA	Regulaiton Mitotic cell cycle		0.0003	3	-2.00974	-1.95154	-2.12749	-1.95019
248	4	HYAL1	Regulaiton Mitotic cell cycle		0.0047	2	-2.06138	-2.14152	-1.86529	-2.17735
255	4	TGFA	Regulaiton Mitotic cell cycle		0.0026	2	-2.14481	-2.4539	-1.92325	-2.05726
266	4	NRK	Regulaiton Mitotic cell cycle		0.0031	2	-2.16377	-2.23359	-1.90617	-2.35155
274	4	OBSL1	Regulaiton Mitotic cell cycle		0.0014	2	-2.17093	-2.16286	-1.98389	-2.36603
268	4	PDGFB	Regulaiton Mitotic cell cycle		0.0001	4	-2.23288	-2.00913	-2.30064	-2.38887
232	4	MAP4K4	Regulaiton Mitotic cell cycle		0.0001	4	-2.24442	-2.29973	-2.32565	-2.10787
238	4	AFAP1L2	Regulaiton Mitotic cell cycle		0.0001	4	-2.31024	-2.48799	-2.49137	-1.95134
265	4	IGF2	Regulaiton Mitotic cell cycle		0.0001	4	-2.36374	-2.37558	-2.37571	-2.33994
276	4	FZD3	Regulaiton Mitotic cell cycle		0.0001	4	-2.38305	-2.0926	-2.20656	-2.84997
277	4	CYP1A1	Regulaiton Mitotic cell cycle		0.0113	1	-2.47226	-1.50704	-1.77662	-4.13312
234	4	CAV2	Regulaiton Mitotic cell cycle		0.0001	4	-2.98384	-3.23253	-2.99976	-2.71924
242	4	TUBA4A	Regulaiton Mitotic cell cycle		0.0001	4	-3.10345	-4.04296	-3.02302	-2.24436
261	4	DACT1	Regulaiton Mitotic cell cycle		0.0001	4	-3.16602	-2.89994	-4.11484	-2.48329
264	4	FAP	Regulaiton Mitotic cell cycle		0.0001	4	-3.62338	-4.49828	-3.36212	-3.00973
253	4	IL1A	Regulaiton Mitotic cell cycle		0.0001	4	-3.82102	-4.67868	-3.85295	-2.93141
231	4	CDK6	Regulaiton Mitotic cell cycle		0.0001	4	-4.57435	-4.77318	-4.42479	-4.5251
246	4	USP2	Regulaiton Mitotic cell cycle		0.0001	4	-5.04939	-7.38488	-4.88128	-2.882
245	4	EPGN	Regulaiton Mitotic cell cycle		0.0001	4	-8.50167	-13.8878	-6.85941	-4.75783
23	1	TIMELESS	replication fork		0.0001	4	2.25471	2.52719	2.20557	2.03138
80	2	PCNA	replication fork		0.0007	3	2.15088	2.16377	2.05469	2.23418
30	1	DONSON	replication fork		0.0013	2	2.14116	2.32714	1.99057	2.10576
1	1	BRCA2	replication fork		0.0003	3	2.07255	2.2113	2.1472	1.85916
100	2	SETMAR	replication fork		0.0009	3	2.0175	2.25098	2.02628	1.77523
14	1	DNA2	replication fork		0.0067	2	1.90279	2.08009	1.8295	1.79877
63	2	DDX11	replication fork		0.0055	2	1.83248	2.02044	1.84922	1.62777
64	2	EME1	replication fork		0.0716	0	1.73915	2.00429	1.57447	1.63869
17	1	GEN1	replication fork		0.0435	1	1.69389	1.88328	1.6319	1.5665
